# Supplementary material
Source: PubMed Central journal article supplement (PMC4001206)
Supplement: supp_WNL.0000000000000284_1198.pdf [file supp_WNL.0000000000000284_1198.pdf]

# Restless legs syndrome

## A predictor of lower physical function

Sanford Auerbach, MD  
Arthur S. Walters, MD

Correspondence to  
Dr. Auerbach:  
sauerbac@bu.edu

*Neurology*® 2014;82:1198–1199

Restless legs syndrome (RLS) is characterized by an urge to move the legs. The symptoms are more intense in the evening and during periods of inactivity. RLS symptoms are relieved by movement. It is classified as a sleep disorder, but in many ways it is actually a disorder of wakefulness that seems to intrude upon the ability to transition from wakefulness into sleep. Estimates on prevalence vary according to the methodology employed, but it generally affects between 3.9% and 14.3% of the population.<sup>1</sup> About one-third of persons are affected seriously enough to warrant treatment.<sup>2</sup>

In this issue of *Neurology*®, Zhang et al.<sup>3</sup> report on a prospective longitudinal follow-up of 12,556 men in the Health Professionals Follow-up Study and conclude that RLS, as well as other sleep complaints, is associated with the eventual development of lower physical function. In other studies, RLS was associated with a reduced health care quality of life, with a reduction that is proportionate to the RLS severity.<sup>4–6</sup> In previous prospective studies with this same cohort, the authors of the current article demonstrated an association of RLS with greater mortality, which in turn was associated with respiratory disease, endocrine disease, nutritional/metabolic disease, and immunologic dysfunction.<sup>7</sup> In a recent prospective study by these same authors, RLS predisposed to coronary heart disease in women but only in those persons with RLS >3 years. This is exactly what one would expect if the continuing burden of RLS is a factor that would result in cardiovascular disease.<sup>8</sup> This relationship, however, was not borne out in another recent prospective study, but the duration of RLS was not taken into account.<sup>9</sup> In other prospective studies the reverse was shown, i.e., that medical problems such as obesity, diabetes, hypertension, and hypercholesterolemia lead to RLS rather than vice versa.<sup>10</sup> RLS influences overall quality of life<sup>2,11–13</sup> and is associated with insomnia<sup>14–16</sup> and erectile dysfunction.<sup>17</sup> Furthermore, the current authors have previously shown a relationship of RLS to depression<sup>18</sup> and to attention-deficit/hyperactivity disorder,<sup>19</sup> at least in women.

The elevation of RLS to the status of a biomarker of disease carries considerable importance, especially in today's changing health care environment. Primary

care physicians are constantly pressured to streamline their time with patients. At the same time, they are expected to screen for a growing number of disorders. There is a growing need for thoroughness with efficiency. The identification of RLS is generally based on a clinical questionnaire, but it can trigger concern for a greater range of medical conditions. Indeed, this article emphasizes the value of identifying RLS in our patients. In terms of the exact relationship of RLS to its comorbidities, the field as a whole is still undecided as to whether RLS predisposes to a variety of medical disorders including cardiovascular disease, whether a variety of medical disorders including cardiovascular disease predispose to RLS, both, or neither. More work needs to be done to unravel these potentially important relationships and the current article is an important step in that direction.

### STUDY FUNDING

No targeted funding reported.

### DISCLOSURE

S. Auerbach reports no disclosures relevant to the manuscript. A. Walters serves as a consultant for UCB Pharma and receives research support from UCB Pharma and MundiPharma. Go to [Neurology.org](http://Neurology.org) for full disclosures.

### REFERENCES

- Ohayon MM, O'Hara R, Vitiello MV. Epidemiology of restless legs syndrome: a synthesis of the literature. *Sleep Med Rev* 2012;16:283–295.
- Allen RP, Walters AS, Montplaisir J, et al. Restless legs syndrome prevalence and impact. REST general population study. *Arch Intern Med* 2005;165:1286–1292.
- Zhang C, Li Y, Malhotra A, Ning Y, Gao X. Restless legs syndrome status as a predictor for lower physical function. *Neurology* 2014;82:1212–1218.
- Phillips B, Hening W, Britz P. Prevalence and correlates of restless legs syndrome: results from the 2005 National Sleep Foundation Poll. *Chest* 2006;129:76–80.
- Earley CJ, Silber MH. Restless legs syndrome: understanding its consequences and the need for better treatment. *Sleep Med* 2010;11:807–815.
- Budhiraja P, Budhiraja R, Goodwin JL, et al. Incidence of restless legs syndrome and its correlate. *J Clin Sleep Med* 2012;8:119–124.
- Li Y, Wang W, Winkelman JW, Malhotra A, Ma J, Gao X. Prospective study of restless legs syndrome and mortality among men. *Neurology* 2013;81:52–59.

See page 1212

From the Sleep Disorders Center (S.A.), Department of Neurology, Boston University School of Medicine, MA; and the Department of Neurology (A.S.W.), Sleep Division, Vanderbilt University School of Medicine, Nashville, TN.

8. Li Y, Walters AS, Chiuev SE, Rimm EB, Winkelman JW, Gao X. Prospective study of restless legs syndrome and coronary heart disease among women. *Circulation* 2012;126:1689–1694.
9. Winter AC, Schürks M, Glynn RJ, et al. Restless legs syndrome and risk of incident cardiovascular disease in women and men: prospective cohort study. *BMJ Open* 2012;2:e00086.
10. Szentkiralyi A, Volzke H, Hoffmann W, Happe S, Berger K. A time sequence analysis of the relationship between cardiovascular risk factors, vascular diseases and restless legs syndrome in the general population. *J Sleep Res* 2013;22:434–442.
11. Allen RP, Stillman P, Myers AJ. Physician-diagnosed restless legs syndrome in a large sample of primary medical care patients in western Europe: prevalence and characteristics. *Sleep Med* 2010;11:31–37.
12. Berger K, Luedemann J, Trenkwalder C, John U, Kessler C. Sex and the risk of restless legs syndrome in the general population. *Arch Intern Med* 2004;164:196–202.
13. Kushida C, Martin M, Nikam P, et al. Burden of restless legs syndrome on health-related quality of life. *Qual Life Res* 2007;16:617–624.
14. Broman J, Mallon L, Hetta J. Restless legs syndrome and its relationship with insomnia symptoms and daytime distress: epidemiological survey in Sweden. *Psychiatry Clin Neurosci* 2008;62:472–475.
15. Ulfberg J, Bjorvatn B, Leissner L, et al. Comorbidity in restless legs syndrome among a sample of Swedish adults. *Sleep Med* 2007;8:768–772.
16. Winkelman JW, Redline S, Baldwin CM, Resnick HE, Newman AB, Gotlieb DJ. Polysomnographic and health-related quality of life correlates of restless legs syndrome in the sleep heart health study. *Sleep* 2009;32:772–778.
17. Li Y, Batool-Anwar S, Kim S, Rimm EB, Ascherio A, Gao X. Prospective study of restless legs syndrome and risk of erectile dysfunction. *Am J Epidemiol* 2013;177:1097–1105.
18. Li Y, Mirzaei F, O'Reilly EJ, et al. Prospective study of restless legs syndrome and risk of depression in women. *Am J Epidemiol* 2012;176:279–288.
19. Gao X, Lyll K, Palacios N, Walters AS, Ascherio A. RLS in middle aged women and attention deficit/hyperactivity disorder in their offspring. *Sleep Med* 2011;12:89–91.
